# Supplementary material
Source: HighWire-hosted journal article supplement (https://www.life-science-alliance.org/content/5/12/e202201584/F9)

Fig. S1A

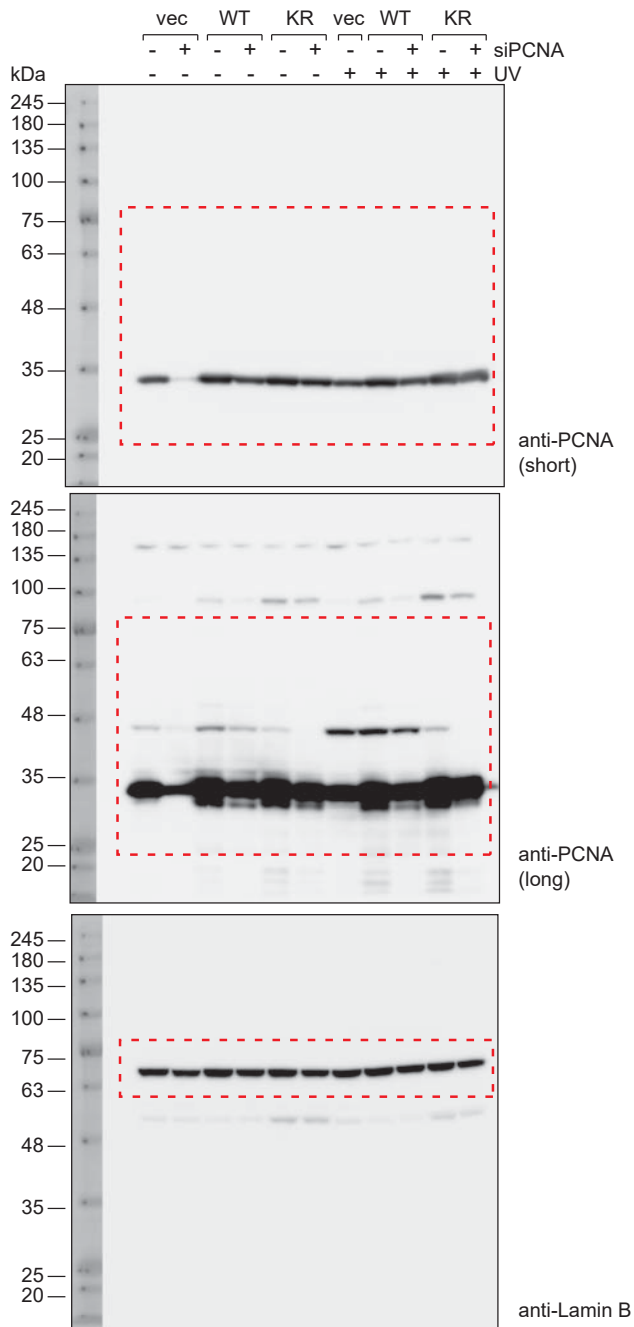

Fig. S1H

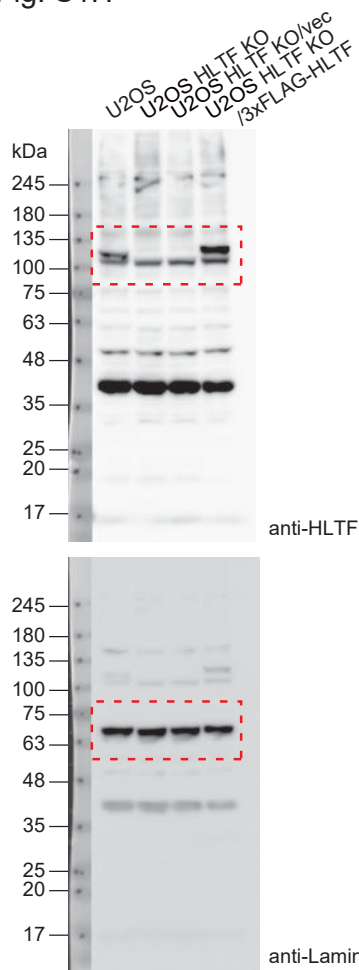

Fig. S1I

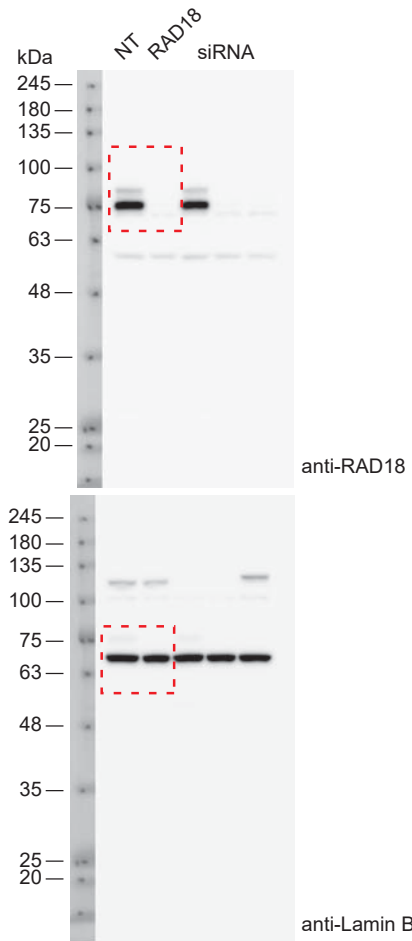

Fig. S1K

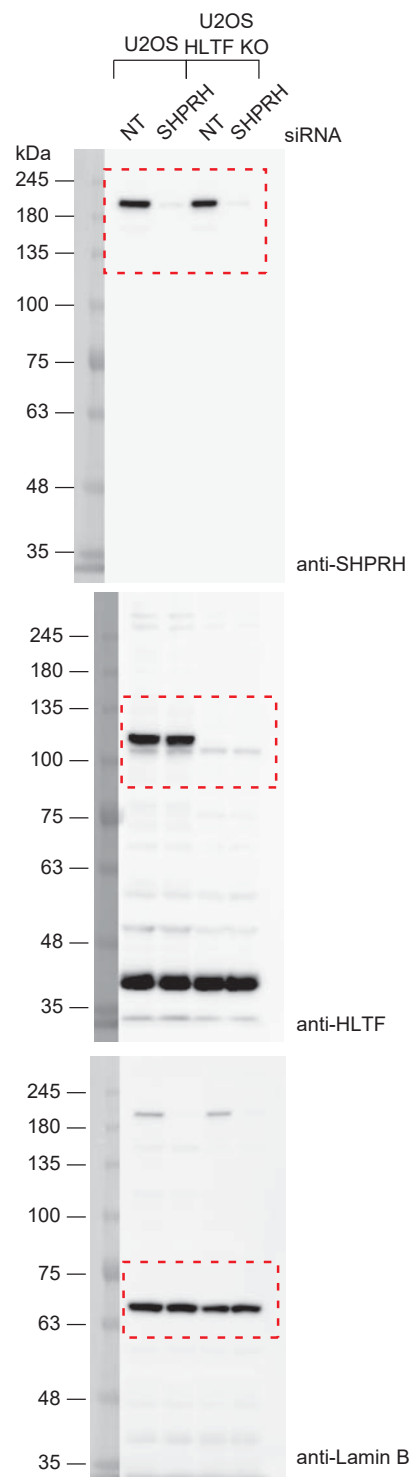

Fig. S1M

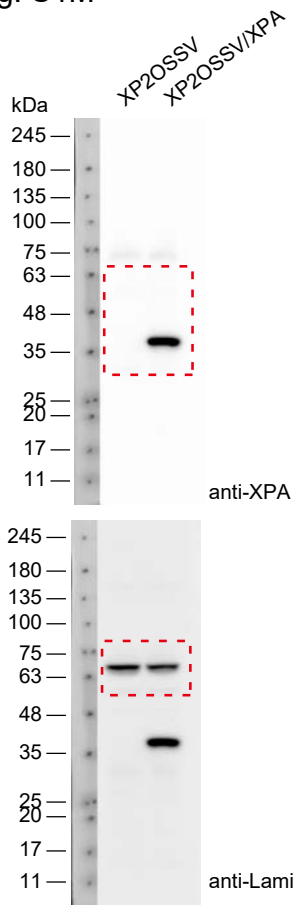

Fig. S1O

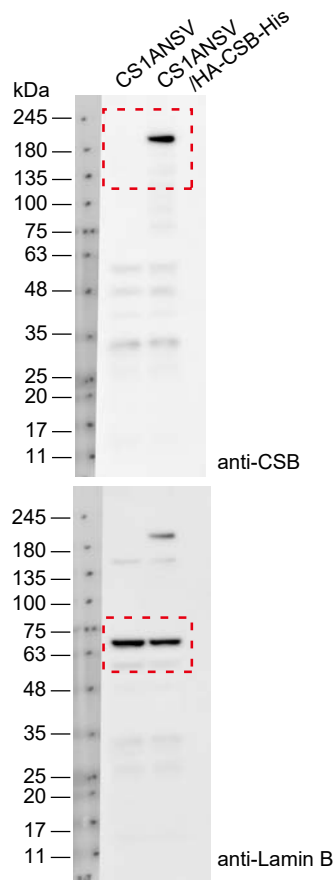

Fig. S1R

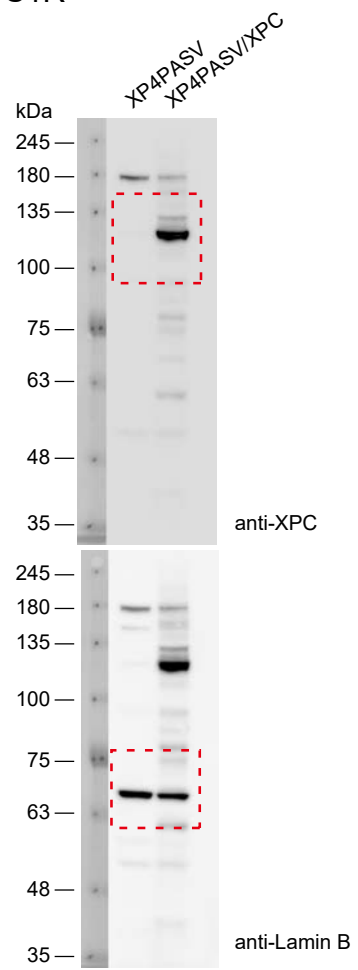

Fig. S3A

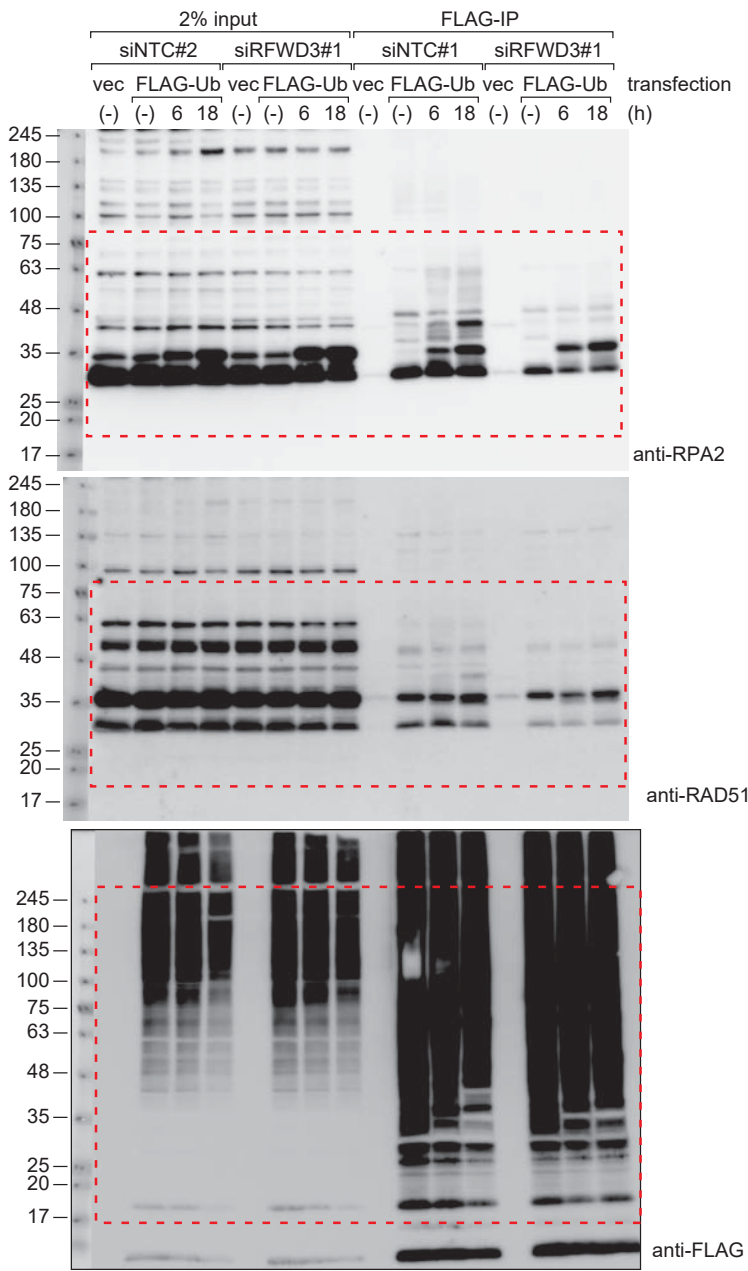

Fig. S3B

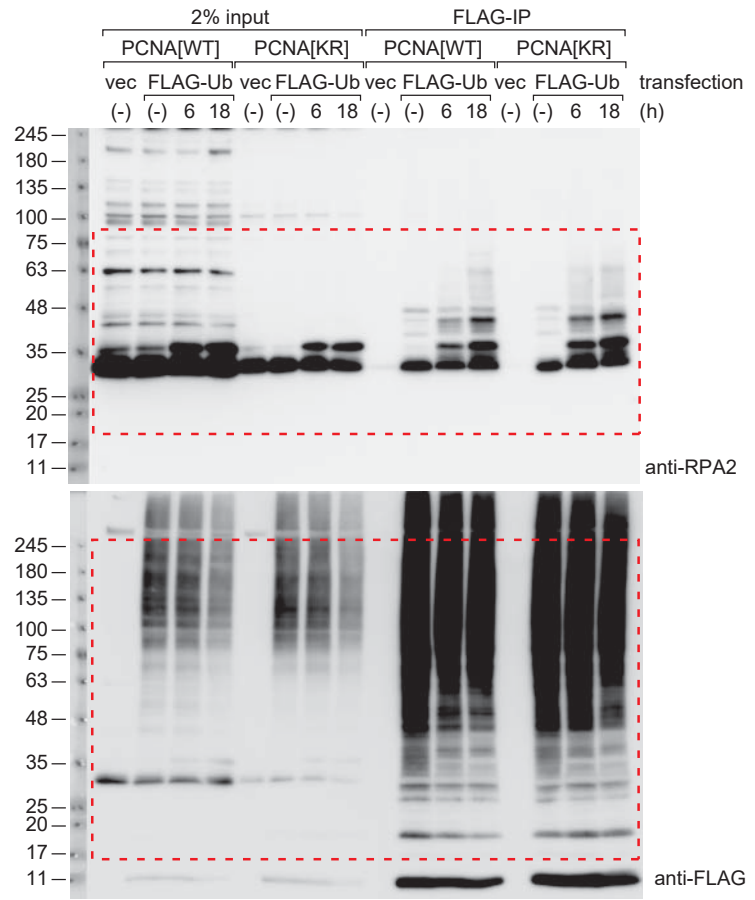

Fig. S3D

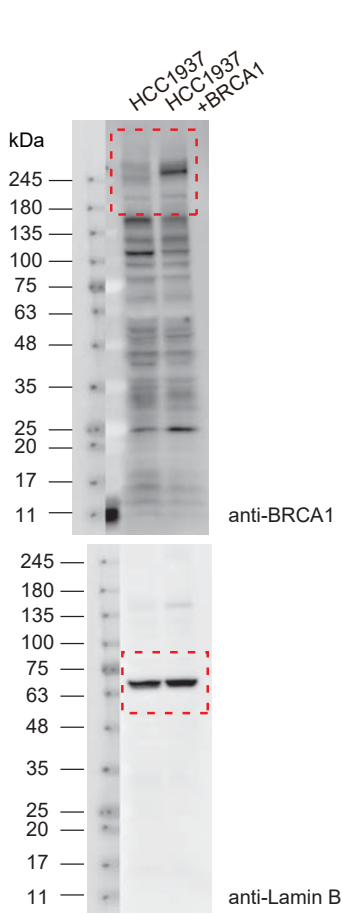

Fig. S3F

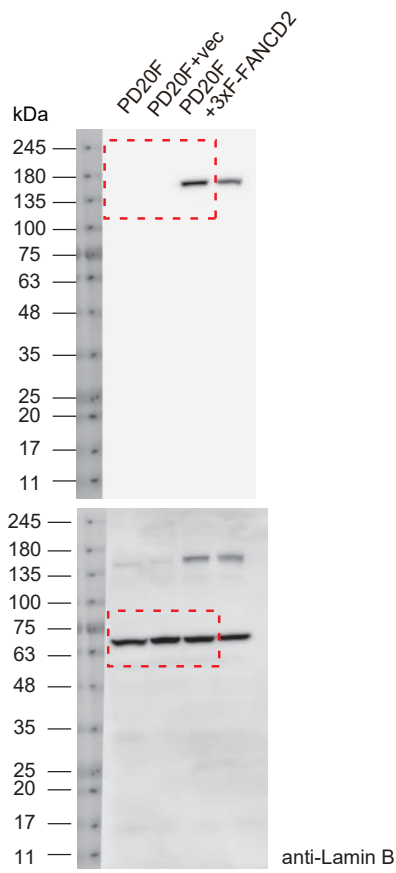

Fig. S3L

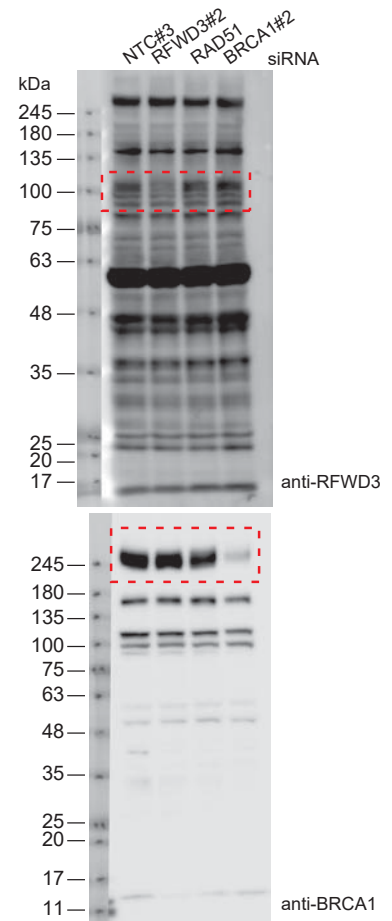

Fig. S3J

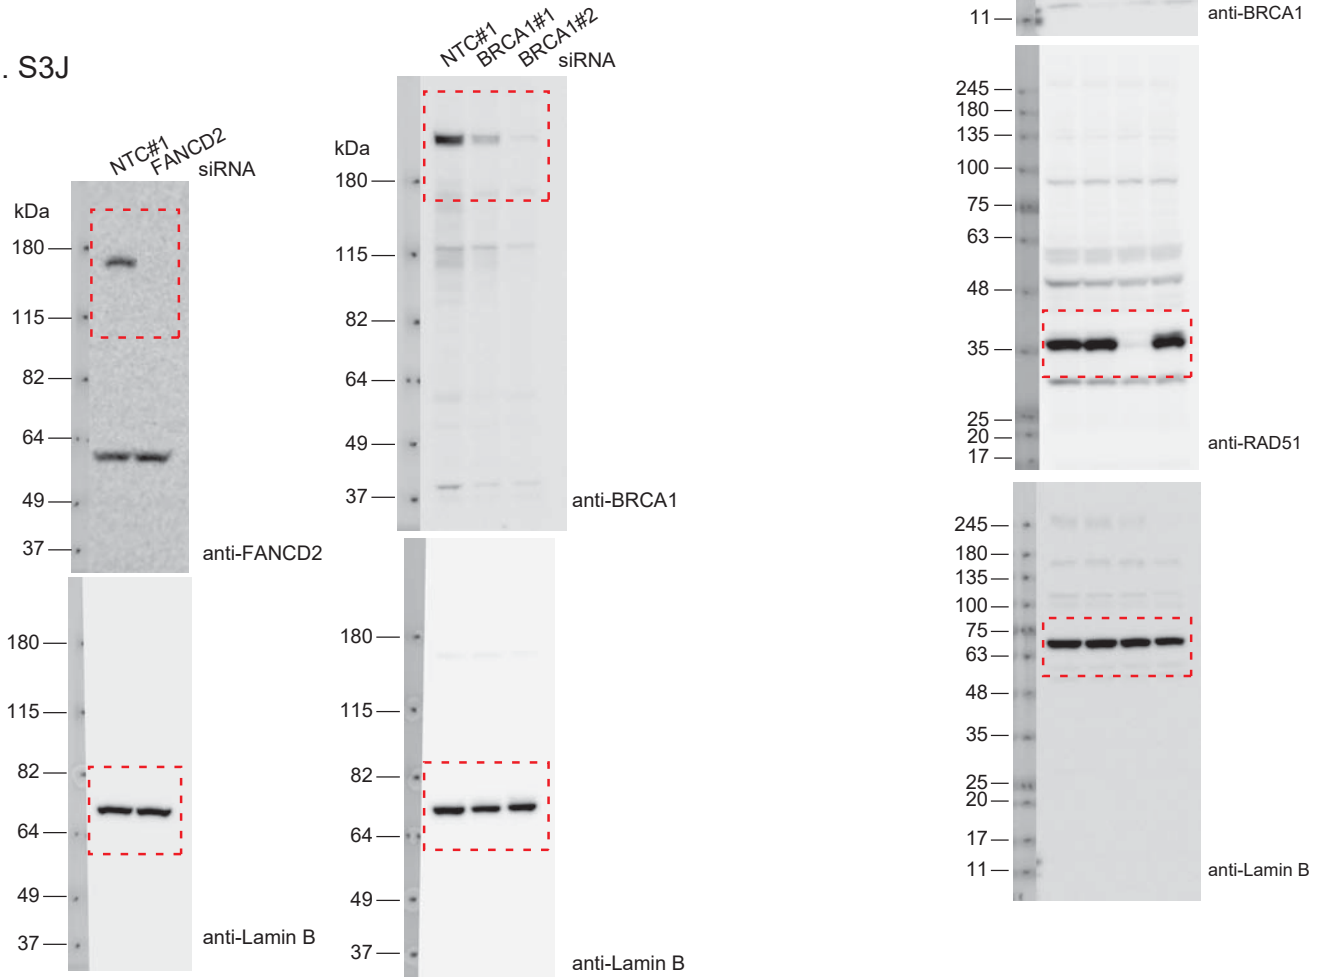

Fig. S4A

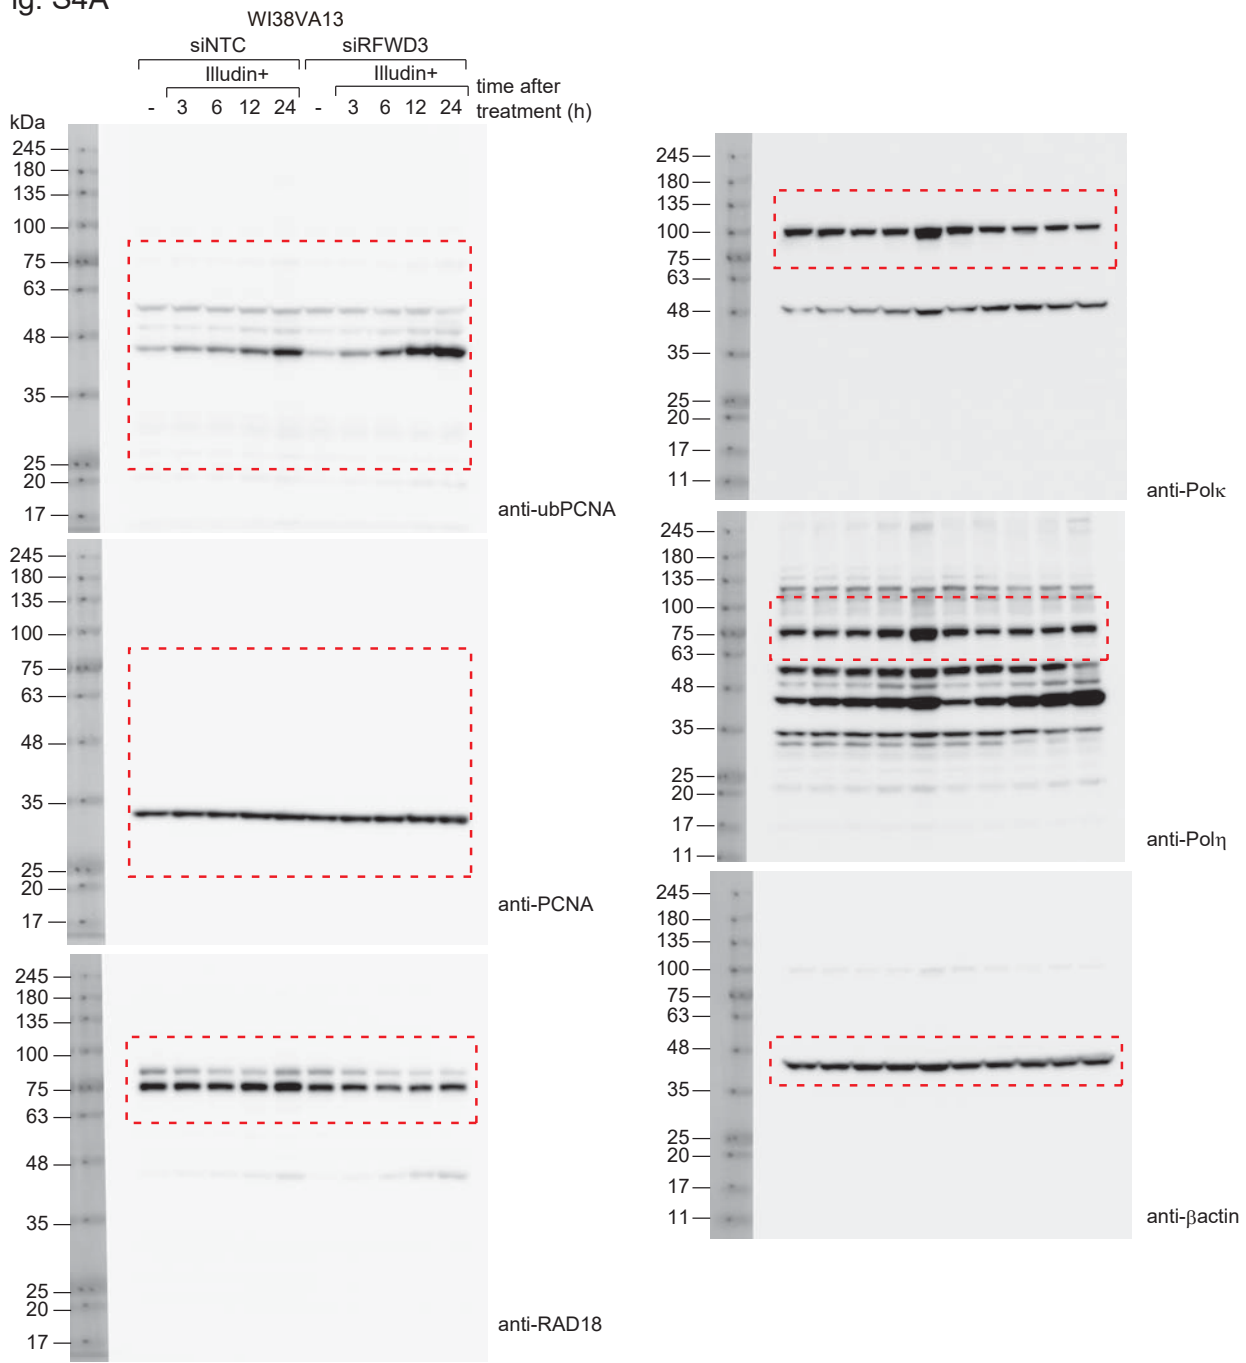

Fig. S4C

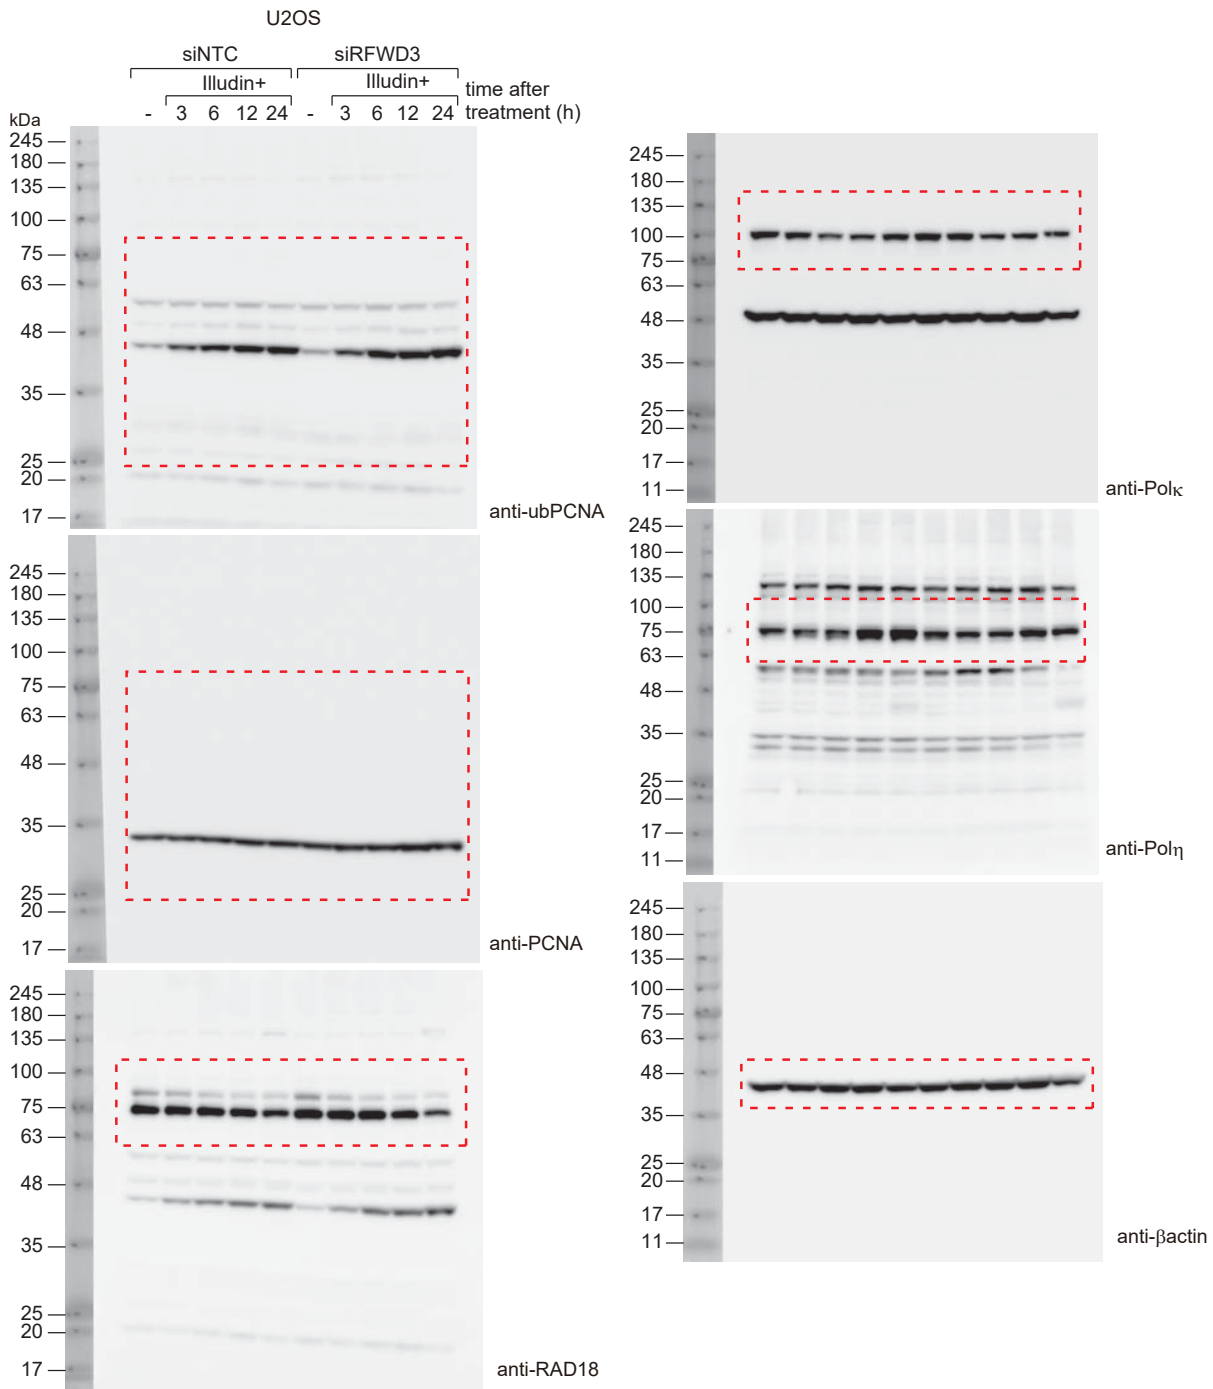

Fig. S4E

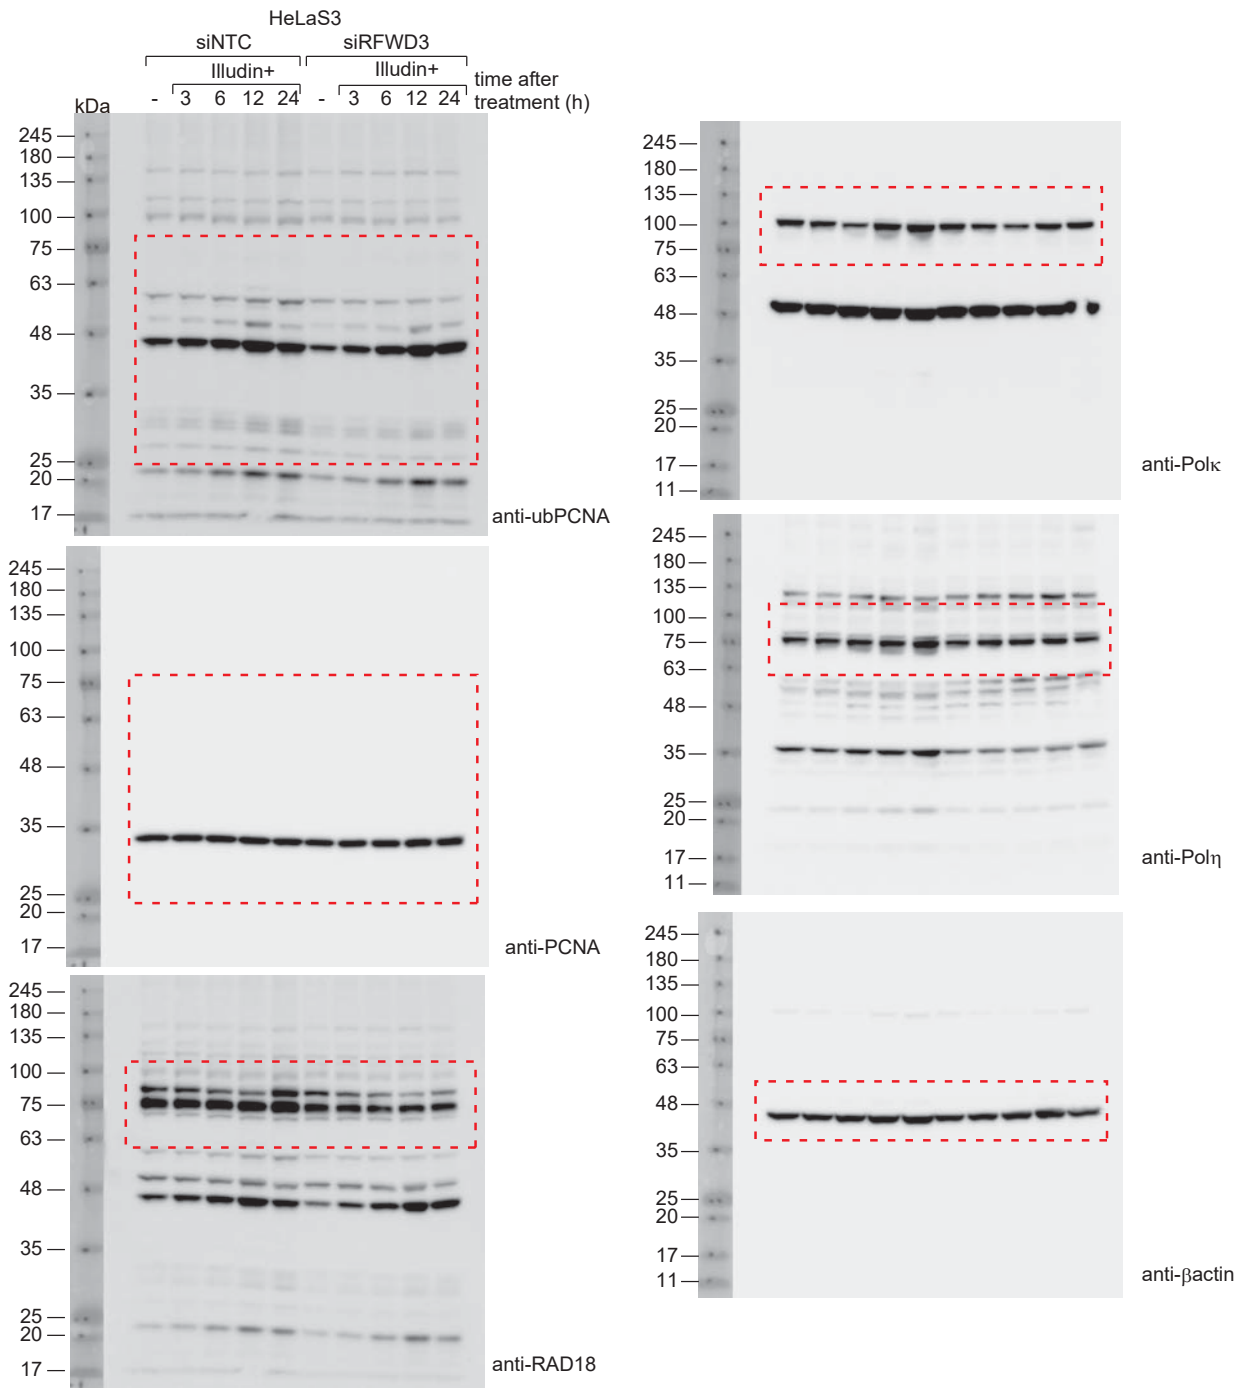



Fig. S4G

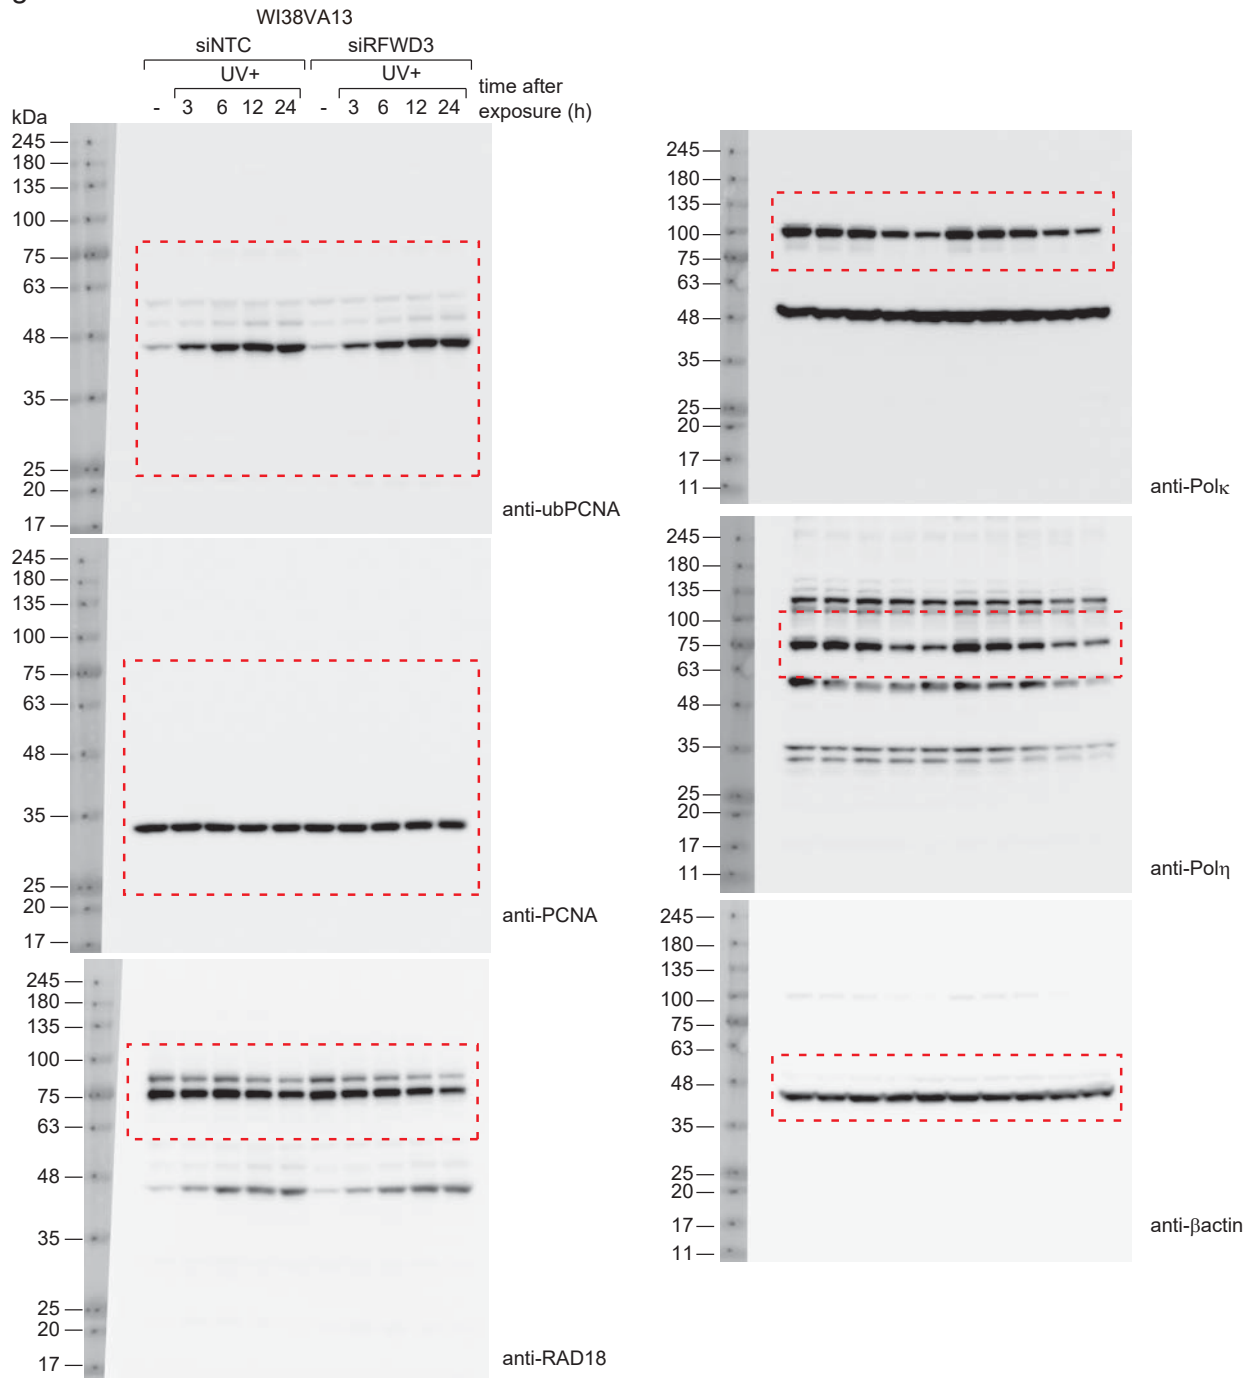

Fig. S4I

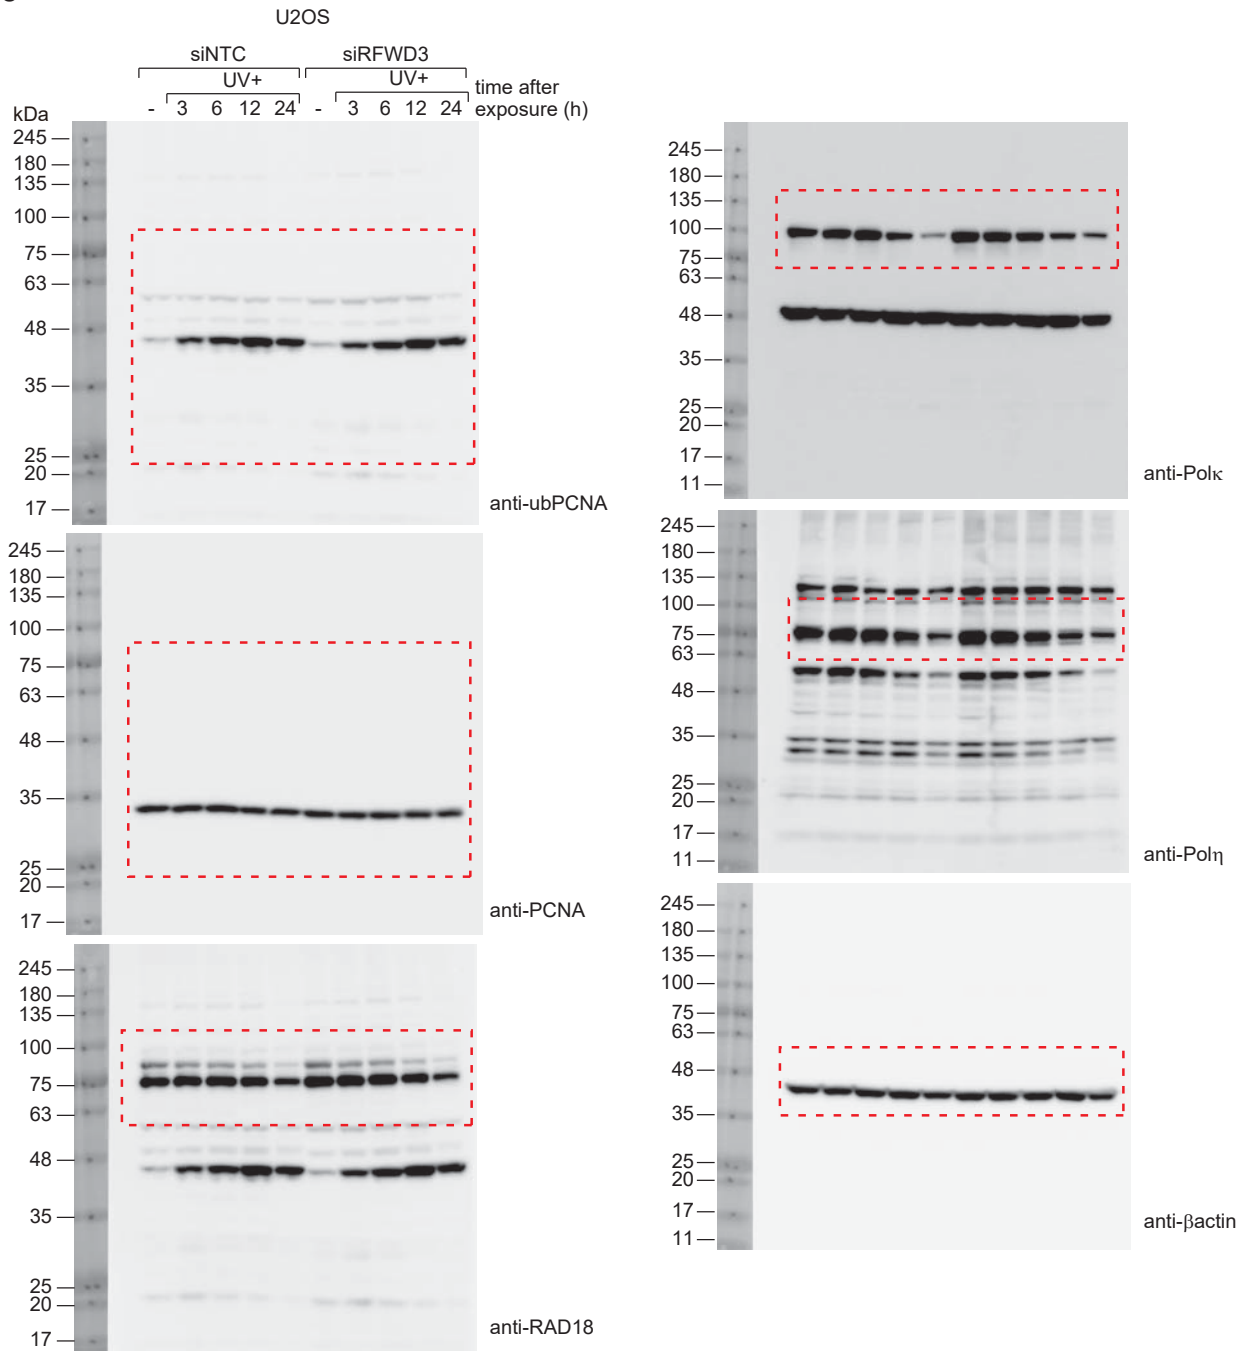

Fig. S4K

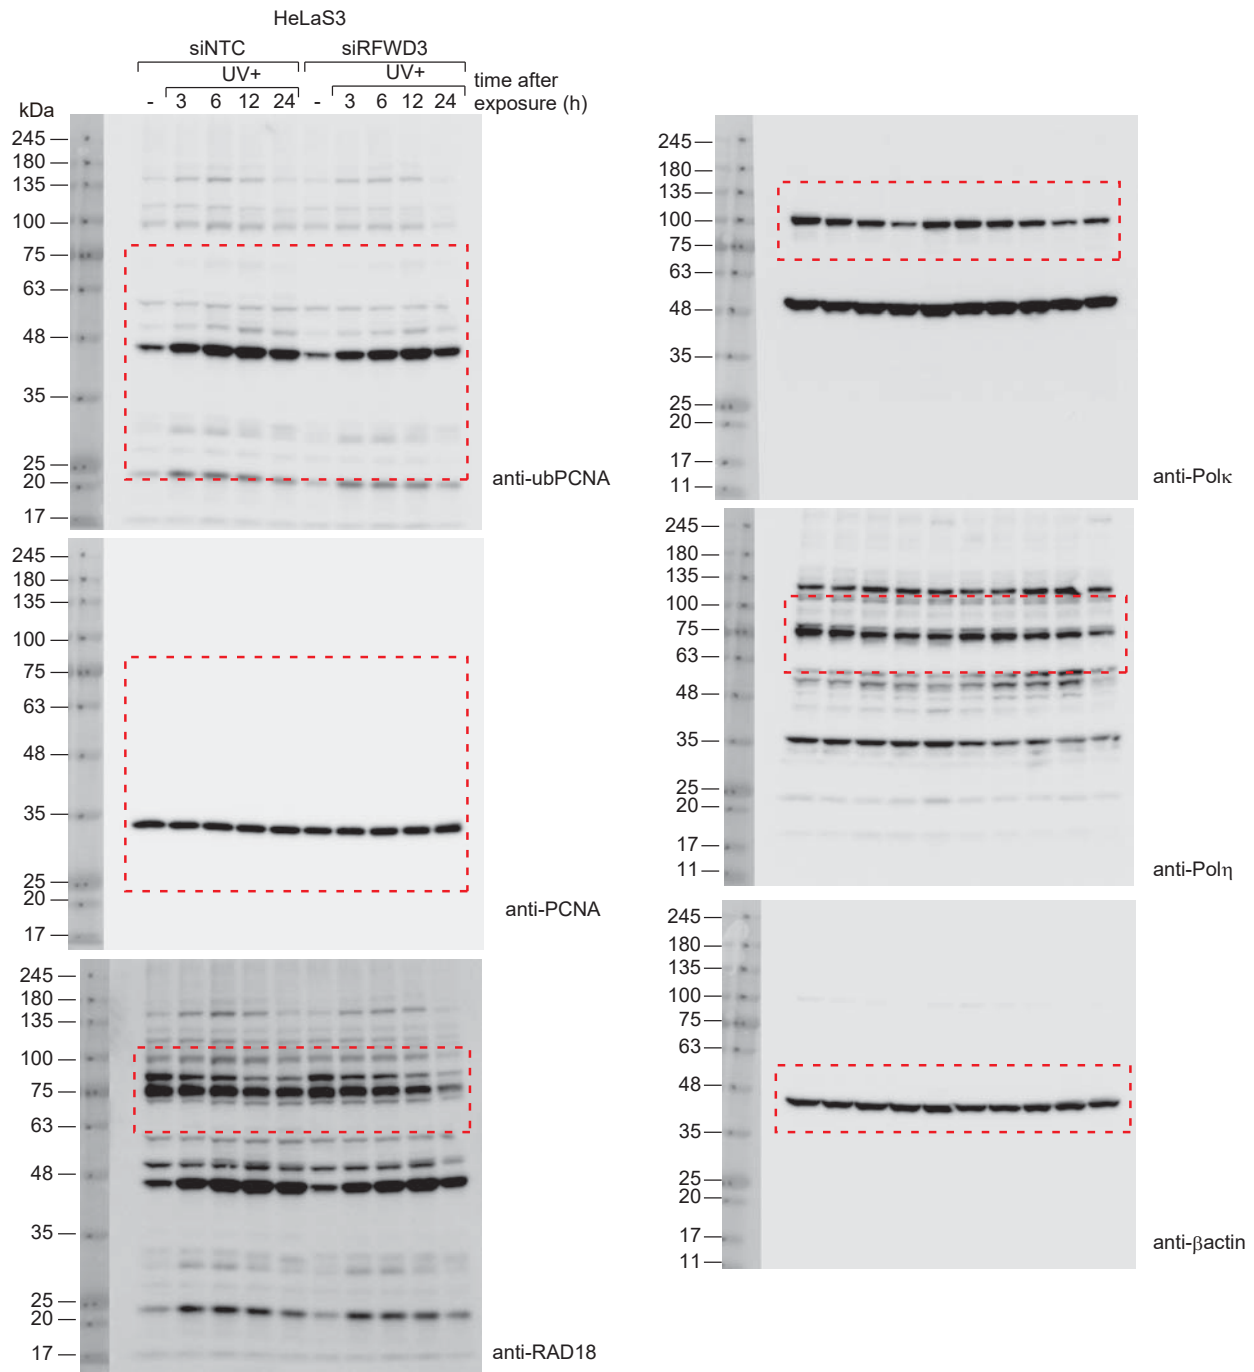

Fig. S5A

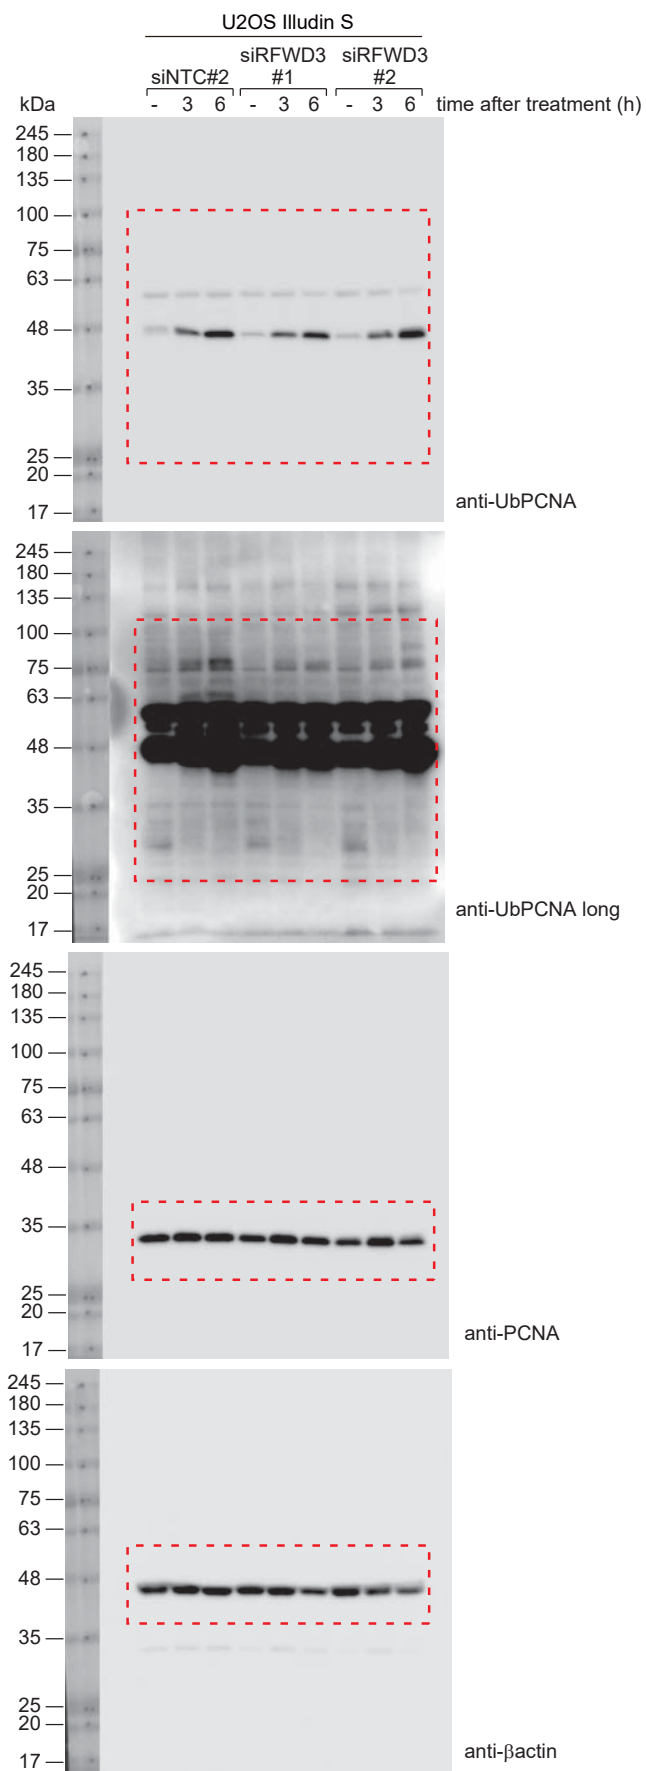

Fig. S5B

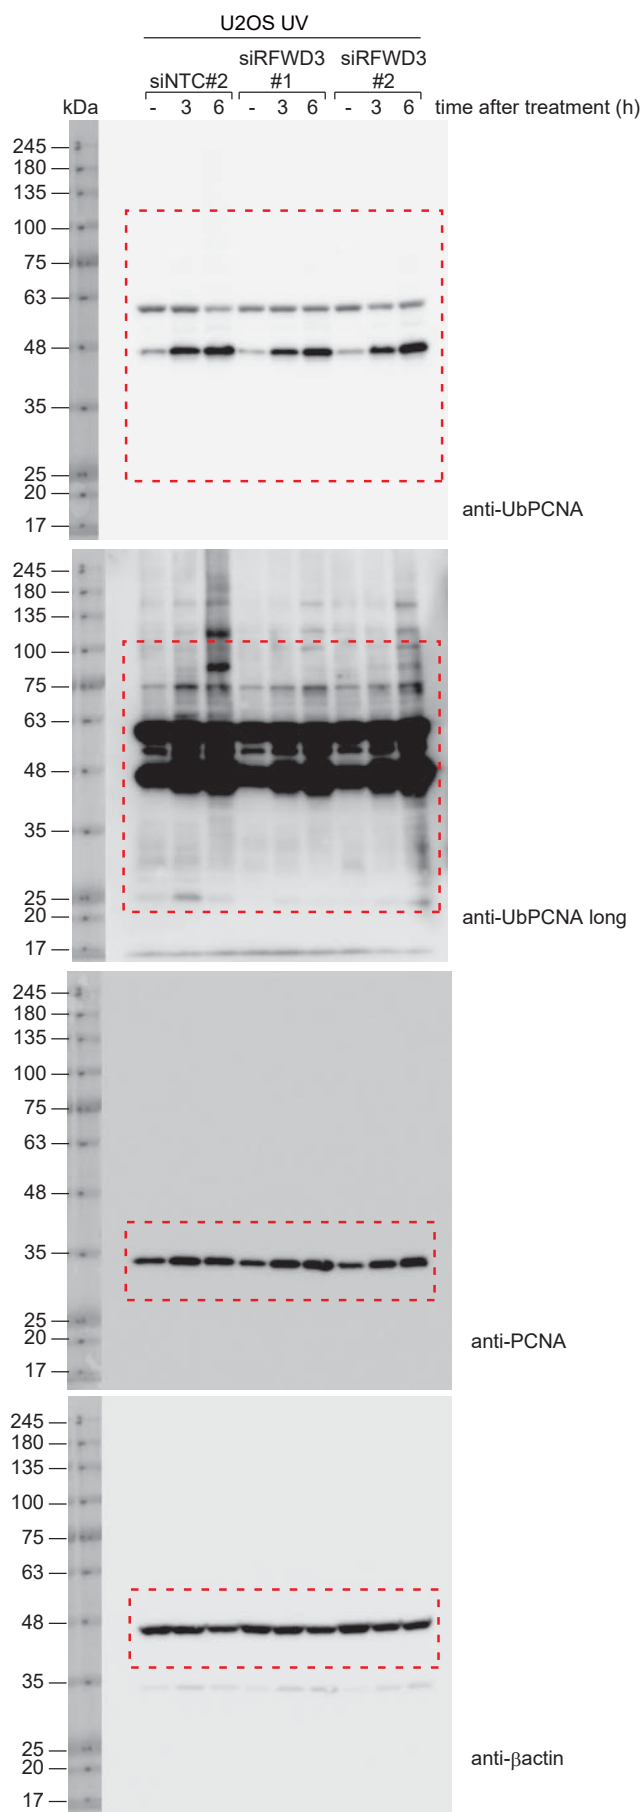

Fig. S5C

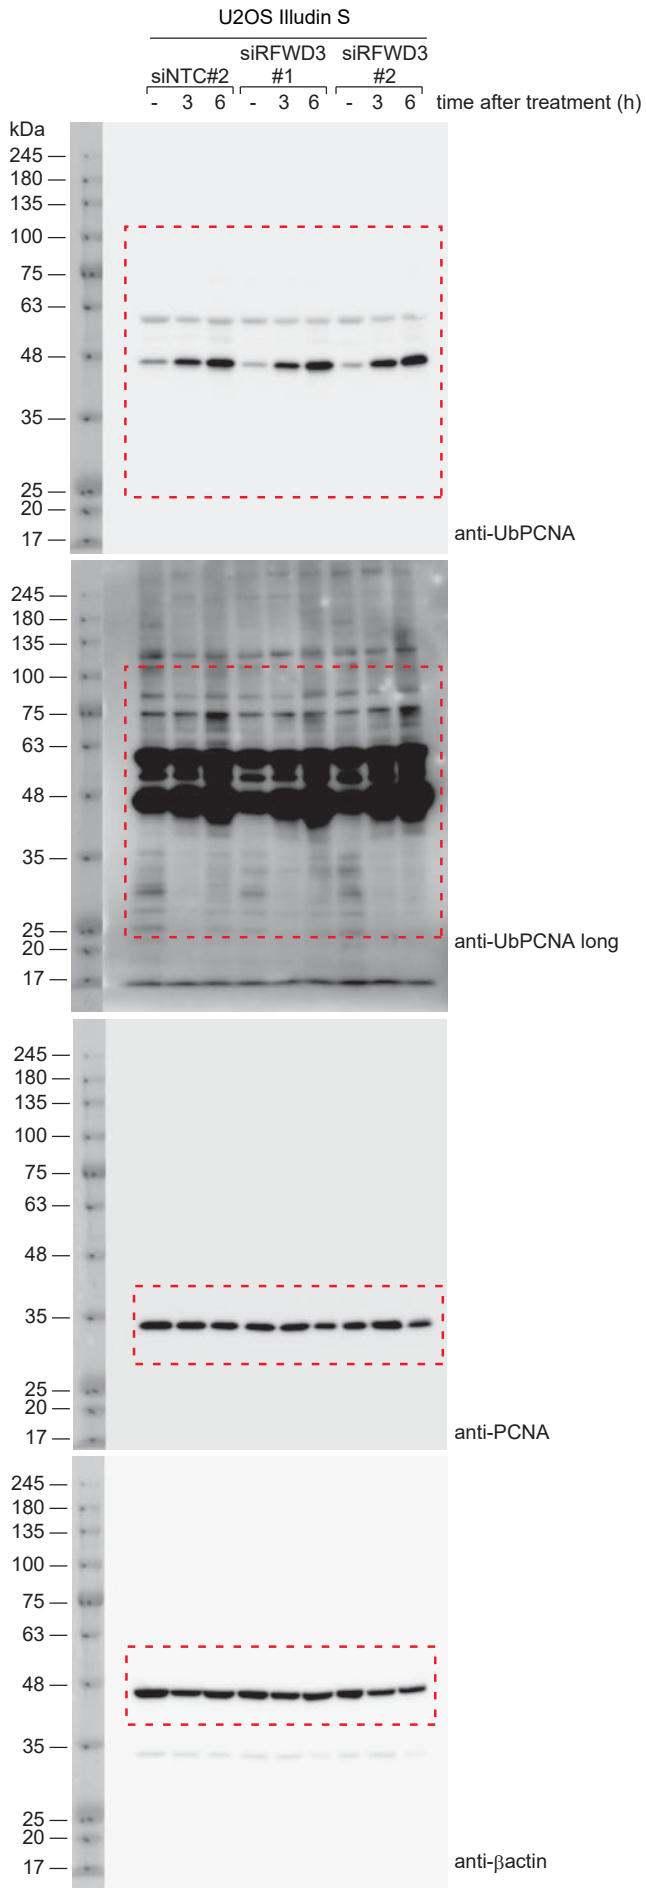

Fig. S5D

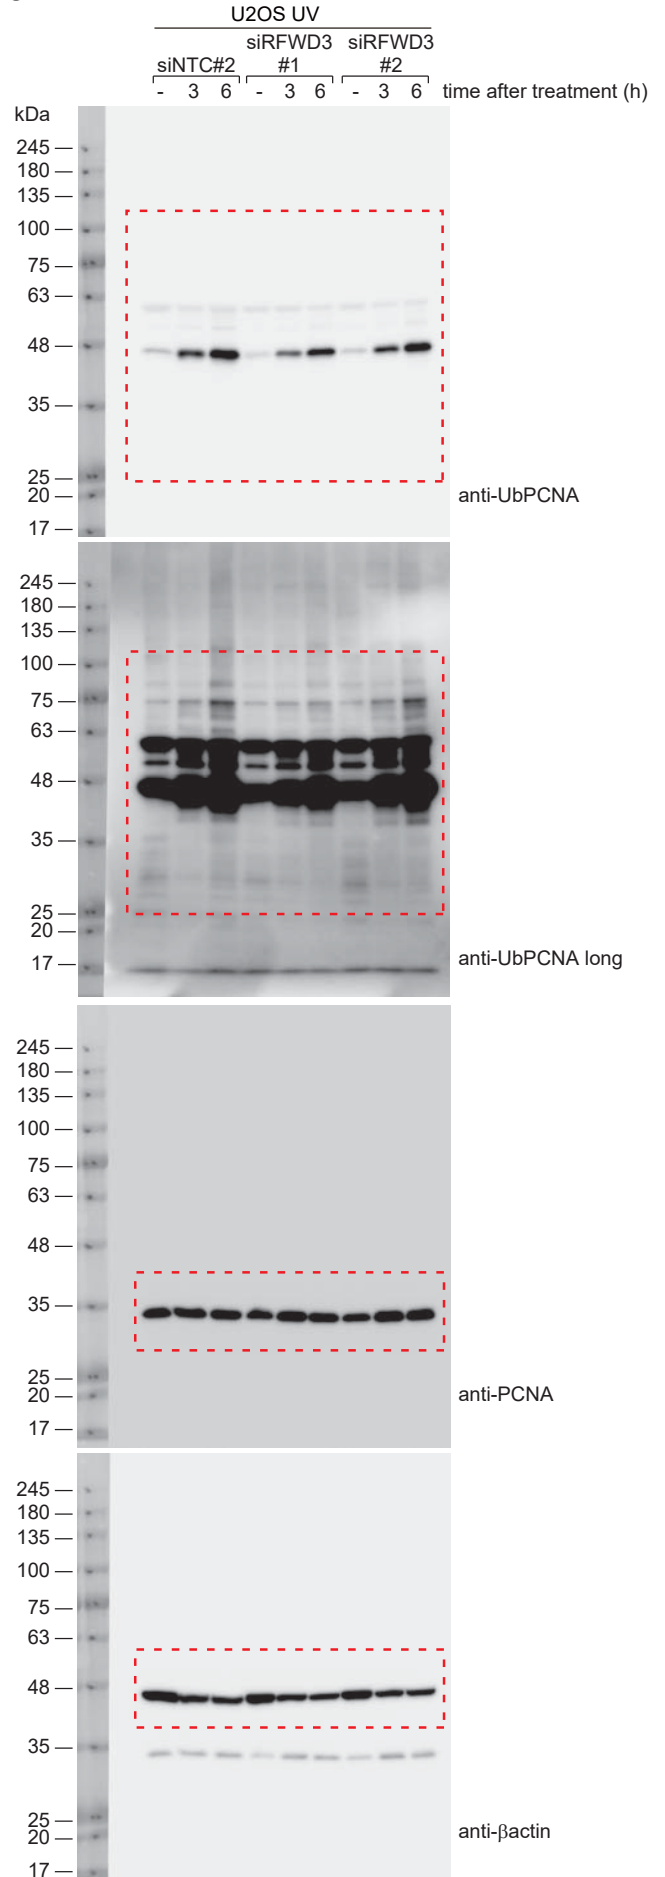

Fig. S5E

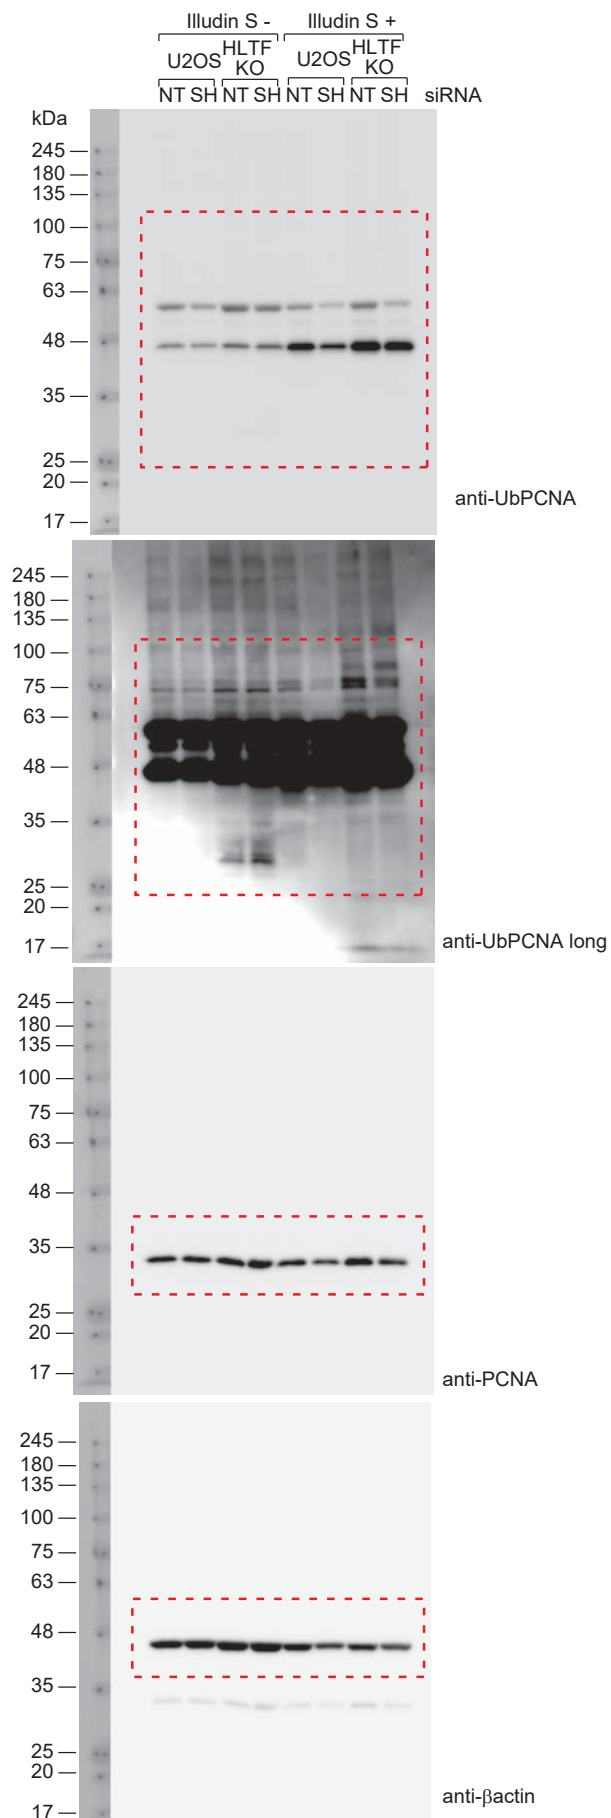

Supplement: inline-supplementary-material-9 [file inline-supplementary-material-9.pdf]
